# Supplementary material for: A Novel Anoikis-Related Gene Signature Predicts Prognosis in Patients with Low-Grade Glioma and Reveals Immune Infiltration
Source: Preprints.org preprint supplement (doi:10.20944/preprints202209.0342.v1), 2022-09-22
Supplement: Supplementary file 1 [file tableS2.xls]

id	HR	HR.95L	HR.95H	pvalue	km
ILK	1.11977151980794	1.00528796765691	1.24729261357372	0.0398009531265177	0.000399604225591488
TPM1	0.995939891815751	0.90816113511495	1.0922029469852	0.931129827912257	0.125822833511674
COPS5	1.15375627917372	1.0229854277564	1.30124390398429	0.0197946552413611	2.00162253438663e-09
IKBKG	1.14729237853618	1.00620628630116	1.30816098027562	0.0401328222928781	0.000102045455580013
CDK11A	1.31428922065418	1.1827307870867	1.46048126453409	3.80030523752552e-07	2.08868056184031e-09
PAK2	1.23526858776176	1.09449306584674	1.39415089188386	0.000620385735298432	1.78787450588747e-06
CALR	1.1990209405141	1.08743436576474	1.32205792004769	0.000270764572295705	5.78584177235442e-08
RHOA	1.16404493953968	1.06319853275598	1.2744568201722	0.00101836143617122	1.99356278152152e-08
BAG1	0.871165223086056	0.807332042533183	0.940045490493936	0.000381739372020445	4.58480381004822e-06
MYC	0.965968946897315	0.892993061248053	1.04490846218425	0.387648689915457	0.0061898217189772
PIN1	1.00818004092556	0.925921355957462	1.09774657251492	0.851188228049423	0.0266599880928723
MDM2	1.27007101787623	1.15419392728528	1.3975817688135	9.69229836863402e-07	1.15252585253245e-10
NOTCH1	1.082102915498	0.980196382694777	1.19460420422087	0.117911633958808	0.0105469641405417
TP53	1.25533581982763	1.13591194061479	1.38731530517181	8.25443468730191e-06	1.95059757235327e-09
ABHD4	0.96173976353906	0.87995907550049	1.05112089701	0.389578214735246	0.000877396620214688
CFLAR	1.73257402946252	1.49685919377578	2.00540757611011	1.75690979468002e-13	0
ITGAV	1.30990199280779	1.18227303424761	1.45130877644839	2.4531446831074e-07	1.16955944928776e-09
HIF1A	1.15693035719734	1.06043680288846	1.26220426126191	0.00103590255413995	1.84145880158804e-05
PBK	1.4629127847766	1.35988346547891	1.57374794987242	1.79199526942949e-24	0
ANGPTL2	0.851311324417652	0.798411218485048	0.907716417683712	8.74334962196997e-07	5.53460910435177e-09
MMP2	1.32331921173369	1.21604079359626	1.44006167010618	8.32624437700339e-11	0
EGFR	1.13288913677071	1.05609205966609	1.21527075643279	0.000494377747609429	1.33964989990076e-07
IFI27	1.1390014627604	1.05595810864587	1.22857556710652	0.000752672242245162	6.12034205538237e-08
ZEB1	1.00018771560907	0.918744982809003	1.08884999120943	0.996544086495974	0.0816141147807452
DAPK2	1.22698363367793	1.04825390268561	1.43618719992976	0.0108760097642932	0.00128428666276403
RHOB	1.01833208584225	0.94667816857094	1.09540947650798	0.625556407393486	0.13516621899077
PPP1R13B	0.88722325291047	0.781780161651363	1.00688804745608	0.0637924973285588	0.000473404180490022
DLG1	1.17522284093978	1.05005174832275	1.3153149147865	0.00495498149822124	0.000402117690752268
KLF12	1.00584251687189	0.88795124280506	1.13938594820943	0.927024889269217	0.119170034707164
VEGFA	1.29531595285545	1.22137062034867	1.37373815103136	6.25484995361398e-18	0
HRAS	0.973065044570932	0.904726318728173	1.0465657529416	0.462389785572127	0.00352434757519726
UBE2C	1.38797905572896	1.30578704569946	1.47534459427136	6.51620443653837e-26	0
MCL1	1.30250507224006	1.17614282756693	1.44244340351134	3.85533260022147e-07	4.53044268766689e-11
AKT2	1.46162731666744	1.31270273522809	1.6274472167206	4.43807702179288e-12	0
LAMA3	0.823503039446033	0.658557586120149	1.0297615125386	0.0886057078010734	0.00228814156548329
HK2	1.50702304517974	1.36290647303831	1.66637880414482	1.27278220919738e-15	0
CSPG4	1.12354282227126	1.03940885368953	1.21448693552724	0.00335415664016021	0.000567906563747389
AR	1.35647356759668	1.22197464260217	1.50577636837879	1.04818225958621e-08	2.35950519344996e-07
CCND1	1.07905728219877	1.00129322522703	1.16286077737338	0.0461706128972041	0.000950054766899466
TAGLN	1.1385760063521	1.05939664683763	1.22367323524234	0.000417247593590361	1.21000196831034e-05
SOD2	1.32375303404201	1.24116996742995	1.41183088627571	1.41698297490076e-17	0
HTRA1	0.930223309573167	0.870607851152024	0.993920976623673	0.0323222040932505	0.00137346138714989
EZH2	1.46326788975818	1.32794956947754	1.61237517328295	1.48373634067303e-14	0
CDH2	1.42497591951525	1.27872466330013	1.58795433409245	1.45685946184796e-10	0
EPHB6	0.950880741896843	0.894778106611095	1.01050101542469	0.104528061436095	0.00357871777223917
SIK1	1.06527090133082	0.939831325976801	1.20745293528362	0.322581312734751	0.0520976900584149
HMOX1	1.30251665907533	1.20129507908742	1.41226720786833	1.52048319304311e-10	6.51327214384878e-10
PTK2B	1.15628717589802	1.05813882577367	1.26353933962177	0.00133365682851199	6.99346140109469e-07
EDA2R	1.0860950341577	1.00363922391683	1.17532515181947	0.0403509524520233	4.03901240965121e-05
UCHL1	1.05831185921624	0.9875836229408	1.13410547252957	0.108288535461816	0.000934793008449342
BIRC5	1.43513746390906	1.33964340018108	1.53743864974584	8.4076013926845e-25	0
PAK1	1.06488255660892	0.988760973855085	1.14686449946409	0.096657929891728	5.86961703751276e-05
CD44	1.2630808740159	1.17880374052297	1.35338329822146	3.3796826878768e-11	1.53577150996398e-12
OLFM3	0.910516709408641	0.82794437145281	1.00132413082005	0.0532752998405786	0.0124073321773099
COL13A1	1.2940301348924	1.13703409726277	1.47270340796355	9.38128076394956e-05	3.93640366466164e-05
LPAR1	1.19459015569394	1.11118289748583	1.2842581030627	1.47326925181605e-06	4.05866998898219e-08
CRYAB	0.92641309521629	0.890298042941234	0.963993159136796	0.000164903576157835	6.08797375845072e-07
