# Supplementary material for: A Novel Anoikis-Related Gene Signature Predicts Prognosis in Patients with Low-Grade Glioma and Reveals Immune Infiltration
Source: Preprints.org preprint supplement (doi:10.20944/preprints202209.0342.v1), 2022-09-22
Supplement: Supplementary file 2 [file tableS3.xls]

id	coef
ANGPTL2	-0.201071961037337
BAG1	-0.167386761552668
CDH2	0.18556523339258
IFI27	0.106572406716854
PTK2B	0.169633090742046
SOD2	0.13212519340821
UBE2C	0.30863577037359
