# Supplementary figures and images for: A Novel Anoikis-Related Gene Signature Predicts Prognosis in Patients with Low-Grade Glioma and Reveals Immune Infiltration
Source: Preprints.org preprint supplement (doi:10.20944/preprints202209.0342.v1), 2022-09-22

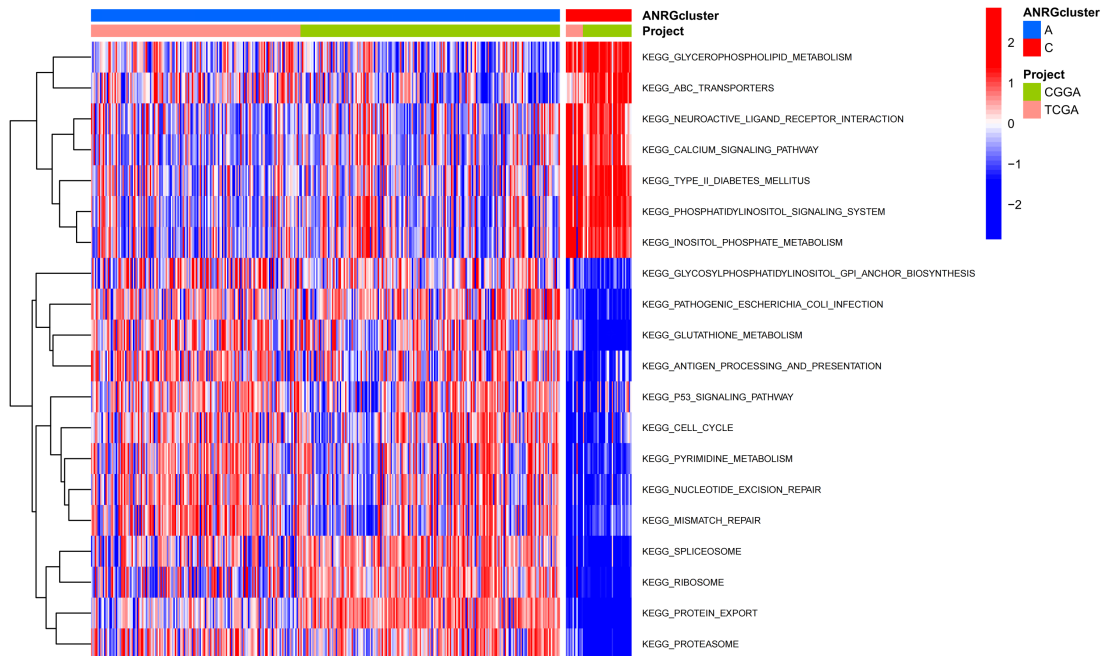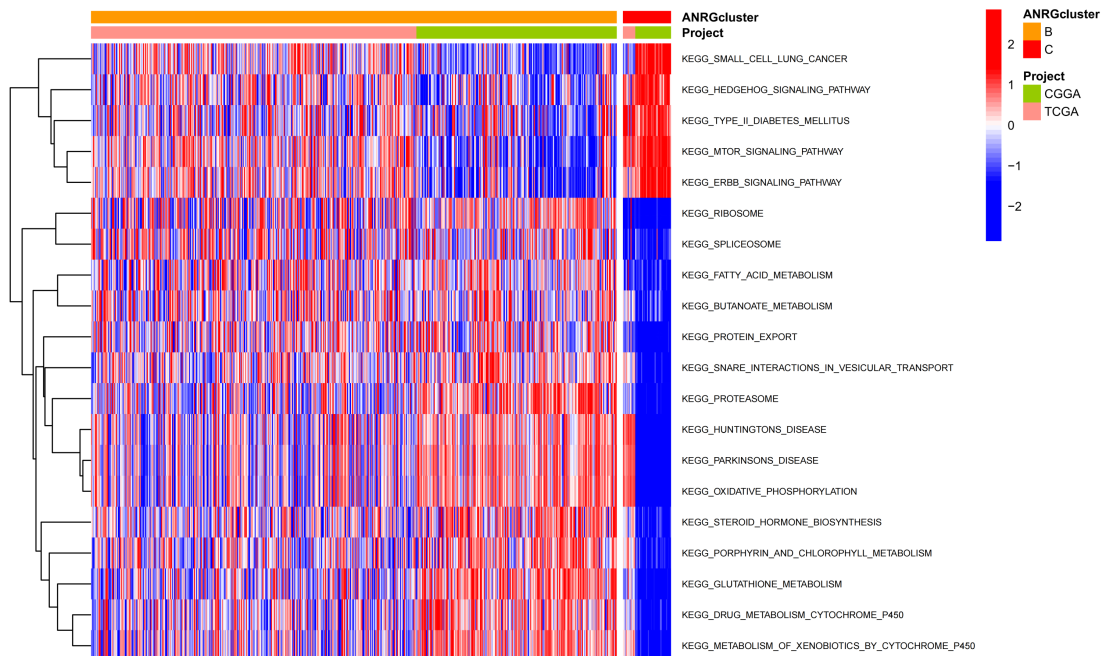

Supplement: Supplementary file 1 [file supplementary]

# drugSensitivity

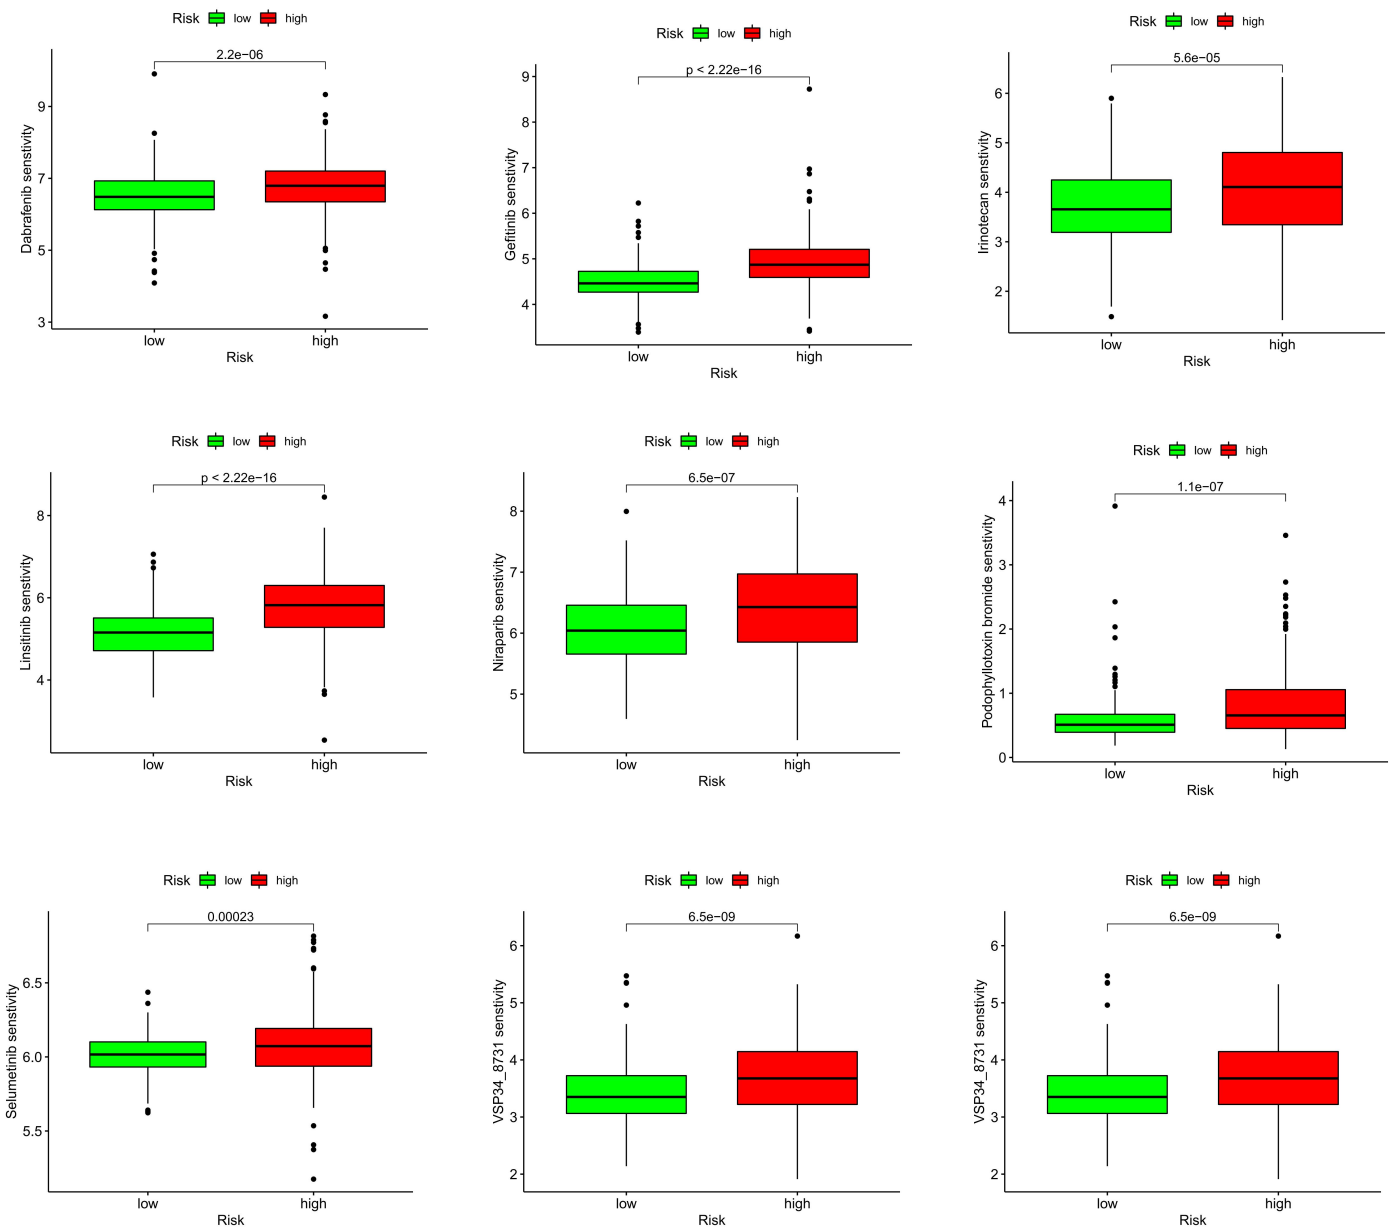

Supplement: Supplementary file 2 [file supplementary]
